# Supplementary material
Source: publisher figshare collection journal article supplement (https://diabetesjournals.figshare.com/ndownloader/files/25510334)
Supplement: Supplementary file 1 [file 25510334]

| <b>Cardiometabolic and Hormonal Outcome Variables</b> |                                            |                 |              |
|-------------------------------------------------------|--------------------------------------------|-----------------|--------------|
|                                                       | <b>-90<sub>min</sub>50%<sub>oBRR</sub></b> | <b>CHO-only</b> | <b>Combo</b> |
| Heart rate (% of heart rate reserve)                  | 46 ± 6                                     | 46 ± 5          | 45 ± 5       |
| <u>Carbohydrate oxidation (g/min)</u>                 |                                            |                 |              |
| 10-15 min                                             | 1.69 ± 1.0                                 | 1.80 ± 0.8      | 1.66 ± 0.9   |
| 85-90 min                                             | 1.55 ± 0.7                                 | 1.82 ± 0.8      | 1.77 ± 0.8   |
| 135-140 min                                           | 1.38 ± 0.6                                 | 1.69 ± 0.7      | 1.54 ± 0.7   |
| <u>Fat oxidation (g/min)</u>                          |                                            |                 |              |
| 10-15 min                                             | 0.48 ± 0.1                                 | 0.52 ± 0.2      | 0.51 ± 0.2   |
| 85-90 min                                             | 0.47 ± 0.1                                 | 0.37 ± 0.1 *    | 0.39 ± 0.1 * |
| 135-140 min                                           | 0.51 ± 0.2                                 | 0.39 ± 0.1 *†   | 0.44 ± 0.1   |
| <u>β-hydroxybutyrate (mmol/L)</u>                     |                                            |                 |              |
| Pre-exercise: 0 min                                   | 0.2 ± 0.2                                  | 0.2 ± 0.1       | 0.2 ± 0.2    |
| Post-exercise: 140 min                                | 0.4 ± 0.3 ‡§                               | 0.1 ± 0.1       | 0.3 ± 0.2    |
| <u>Energy expenditure (kcal/min)</u>                  |                                            |                 |              |
| 10-15 min                                             | 7.5 ± 2.2                                  | 7.7 ± 1.8       | 7.6 ± 2.0    |
| 85-90 min                                             | 7.1 ± 1.9                                  | 7.1 ± 1.9 *     | 7.1 ± 2.0 *  |
| 135-140 min                                           | 7.0 ± 2.0 *                                | 6.9 ± 1.9 *     | 6.9 ± 1.9 *  |
| Total caloric expenditure (kcal)                      | 863 ± 241                                  | 869 ± 218       | 861 ± 231    |
| Caloric intake (kcal)                                 | 3 ± 13 ‡                                   | 160 ± 79        | 124 ± 68     |
| Net caloric expenditure (kcal)                        | 860 ± 240 ‡                                | 709 ± 217       | 737 ± 201    |
| <u>Plasma glucagon (pg/mL)</u>                        |                                            |                 |              |
| Pre-exercise: 0 min                                   | 15.1 ± 8.9                                 | 16.3 ± 13.0     | 11.7 ± 7.0   |
| Mid-exercise: 65 min                                  | 21.3 ± 14.5                                | 15.5 ± 15.5     | 13.9 ± 7.5   |
| Post-exercise: 140 min                                | 30.9 ± 22.3 *                              | 18.1 ± 8.9 †    | 22.7 ± 19.2  |
| <u>Salivary cortisol (ng/mL)</u>                      |                                            |                 |              |
| Pre-exercise: 0 min                                   | 41.3 ± 15.5                                | 44.3 ± 19.4     | 40.7 ± 15.5  |
| Post-exercise: 140 min                                | 32.7 ± 14.8                                | 28.8 ± 14.0 §   | 27.7 ± 9.5 § |

**Supplementary Table S1. Cardiometabolic and hormonal outcome variables.** Cardiometabolic outcomes in all treatment conditions (n=15) during exercise. Values are presented as mean ± SD. \*Significantly different from the 10-15-minute time period within the same strategy ( $P<0.05$ ). †Significantly different from -90<sub>min</sub>50%<sub>oBRR</sub> at the same time period ( $P<0.05$ ). ‡Significantly different from other strategies ( $P<0.05$ ). §Significantly different from pre-exercise within the same strategy ( $P<0.05$ ). ||Significantly different from the CHO-only strategy at the same time period ( $P<0.05$ ).

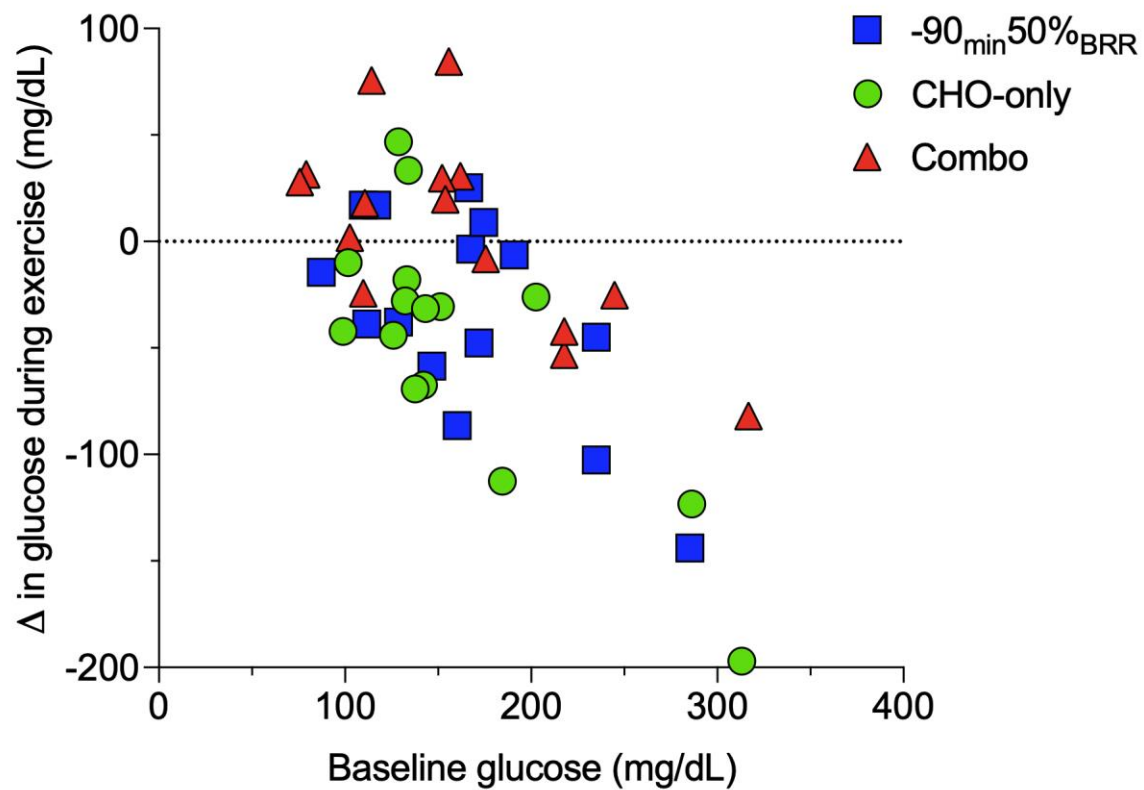

**Supplementary Figure S1. Change in glucose dependence of baseline glucose.**  
Change in blood glucose level during 120 minutes of exercise relative to baseline pre-exercise glucose level.

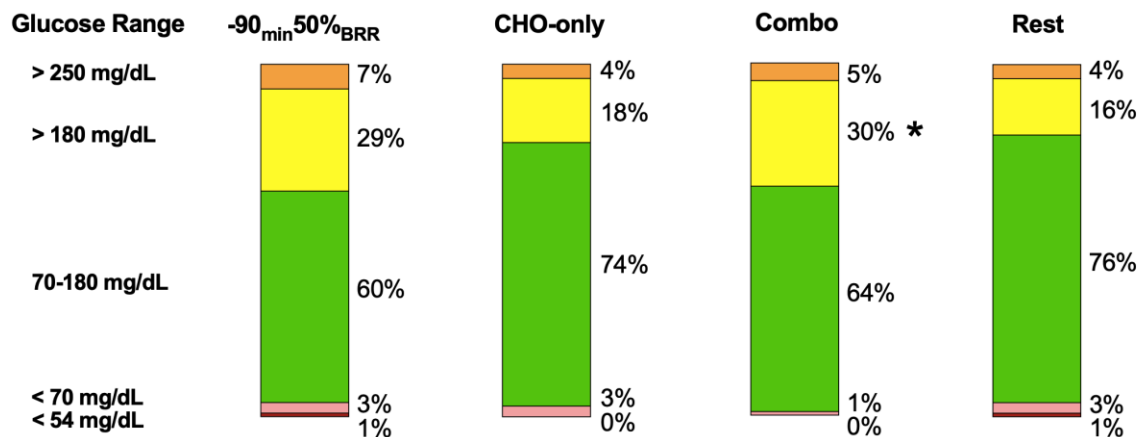

**Supplementary Figure S2. Continuous glucose monitor ranges 12 hours following exercise across three conditions and rest day.** Glucose ranges defined as level 2 hyperglycemia (>250 mg/dL), level 1 hyperglycemia (181-250 mg/dL), target range (70-180 mg/dL), level 1 hypoglycemia (54-69 mg/dL) and level 2 hypoglycemia (<54 mg/dL), data presented as mean. \*Significantly different from Rest ( $P<0.05$ ).
